# Supplementary material for: Reactivation of codogenic endogenous retroviral (ERV) envelope genes in human endometrial carcinoma and prestages: Emergence of new molecular targets
Source: PubMed Central journal article supplement (PMC3717959; doi:10.18632/oncotarget.679), 2012-10-13
Supplement: oncotarget-03-1204-s001.pdf [file oncotarget-03-1204-s001.pdf]

**Reactivation of codogenic endogenous retroviral (ERV) envelope genes in human endometrial carcinoma and prestages: Emergence of new molecular targets – Strissel et al**

**Supplemental Table 1a: Primer for cloning and qPCR of env genes.**

| genes      | TF and BR cloning primers : 5'→3'                                    | TF and BR qPCR primers : 5'→3'                        |
|------------|----------------------------------------------------------------------|-------------------------------------------------------|
| Syncytin-1 | [29]                                                                 | ATGGAGCCCAAGATGCAG<br>AGATCGTGGGCTAGCAG               |
| Syncytin-2 | [29]                                                                 | TTGGGTAAATCAATCAGGAAAAGT<br>GTAAACTGGAGGCTTGATTTAGGA  |
| Syncytin-3 | [29]                                                                 | TTAGCCACAAATTCTGGGATAACT<br>AGAGGTAACAATAGAGGCCATGAG  |
| erv-3      | [29]                                                                 | AACTAATGCCCAAGATAATTTCA<br>TTAAGAACCAGATGCTCTGACTTG   |
| envV1      | [29]                                                                 | GTGGCTCCATAACTTTGGAAA<br>TAAGTGCAGCTGGTCCCAGTA        |
| envV2      | [29]                                                                 | TGTGTCTCTTCTAGGATAAAGCAATTT<br>AGGGGGAGATGTGCTTATAGGT |
| envT       | GACGCTAGCTGTAGAGATACTTACCAGT<br>TTAAGTGTGGCTTCTACTCCTAATCCTA         | AGGATTTGATGTTGGGACTATGTT<br>GGTGTCTTCTGGAATATAGGGTCAC |
| envRb      | GTCCAGACTTCCAGACCTCAGAACACTCA<br>GTGCATATAATACTTCCAGCATTTCAT         | CACTAAGGGACACTTAAGCCAGAT<br>AGTATAGTATGTCGGCACTGTCCA  |
| envK1-6    | GACCTGAATTCCAGTCTAACAGTTCCT<br>CGATGTTCTAAGCTCATGAGTCTGTCT           | TTTGACTGAAGTATTAAGGTTGT<br>GTGACTGCAATTAATCCCATAATC   |
| envH1-3    | TATCTCCACCACACTATCAACCTTACCCATTC<br>AAGTGTCTTCCCTAAGCAATAATTACTGCT   | TCCCCAGACATTTACATCAG<br>GAGCGGCCACAGGAATACTA          |
| envE       | CAGTGTATTCATCAGGTCACCGAGGTAGGACAG<br>AGTTCTAGTGGGTTACAGTGACCAGCAGCAC | ACTGGCCTTTTCTTAGGTGATAC<br>TACTATTAATGGCTGCACAAGCA    |
| envFc1     | CTGACATGGTCACCTATGATGACAAGGCTG<br>TG TAGAGAGGCTAAGGATTCGGCTGAGGCT    | GCTACACCACTCCTAACTCATCCT<br>TTGTAAGGGTGAAGTTACACCAGA  |
| envFc2     | TGTTCTATGTCAATACCTCCACTGGAGGAC<br>TAGCGTGGAGTTACACCAGAAGTAGCCTCT     | CTCCATTAGTAGCAGTTCCTCTCC<br>GAGAATAGTGGGACCTGTCCTTT   |
| envW2      | [24]                                                                 | GCTACAAATGGTTCTTCAAATGGAG<br>ACAAGGGCTAGCAGGCT        |

**Supplemental Table 1B: Slope ( $\gamma$ ), PCR amplification efficiency (correlation coefficient) ( $R^2$ ) and intercept (t) of standard curves of cloned env genes in qPCR.**

| <b>HERV</b> | <b>gene</b>            | <b><math>\gamma</math>:</b> | <b><math>R^2</math>:</b> | <b>t:</b> |
|-------------|------------------------|-----------------------------|--------------------------|-----------|
| -W          | Syncytin-1             | -3.1721                     | 0.9919                   | 31.269    |
| -FRD        | Syncytin-2             | -3.0772                     | 0.9953                   | 31.7325   |
| -P(b)       | Syncytin-3             | -3.4553                     | 0.9776                   | 36.012    |
| -R          | erv-3                  | -3.2032                     | 0.9933                   | 35.328    |
| -K1-6       | envK1-6                | -3.1379                     | 0.9987                   | 34.887    |
| -V1         | envV1                  | -3.2252                     | 0.9890                   | 33.247    |
| -V2         | envV2                  | -3.1490                     | 0.9978                   | 32.721    |
| -E4-1       | envE                   | -3.1361                     | 0.9865                   | 26.9127   |
| -H1-3       | envH1-3<br>(p59,60,62) | -3.2946                     | 0.9905                   | 27.6260   |
| -T          | envT                   | -3.4772                     | 0.9931                   | 34.7865   |
| -R(b)       | envRb                  | -3.3099                     | 0.9977                   | 34.198    |
| -Fc1        | envFc1                 | -3.289                      | 0.9988                   | 33.742    |
| -Fc2        | envFc2                 | -3.4686                     | 0.9987                   | 39.6515   |
| -W2         | envW2                  | -3.5424                     | 0.9886                   | 33.62     |

**Supplemental Table 2: Gene expression by qPCR and P-values.**

|                | control (n= 31) | polyp (n=20)                                | hyperplasia<br>(n=9)                      | EnCa (n=38)                                 | hierachical<br>expression         |
|----------------|-----------------|---------------------------------------------|-------------------------------------------|---------------------------------------------|-----------------------------------|
| genes          | mol/ng ± sem    | mol/ng ± sem                                | mol/ng ± sem                              | mol/ng ± sem                                | low →high                         |
| Syncytin<br>-1 | 18.52 ± 6.67    | <b>88.54 ± 34.59</b><br><b>P: 0.0025</b>    | <b>77.7 ± 21.8</b><br><b>P: 1.10 E-4</b>  | <b>236.76 ± 77.55</b><br><b>P: 6.72 E-8</b> | control > hyper ><br>polyp > EnCa |
| Syncytin<br>-2 | 1.44 ± 0.30     | <b>2.82 ± 0.73</b><br><b>P: 0.049</b>       | <b>8.95 ± 4.94</b><br><b>P: 0.0107</b>    | <b>9.90 ± 2.80</b><br><b>P: 5.71 E-4</b>    | control > polyp ><br>hyper > EnCa |
| Syncytin<br>-3 | 2.04 ± 0.53     | <b>5.43 ± 1.63</b><br><b>P: 0.0044</b>      | <b>13.14 ± 7.54</b><br><b>P: 0.0016</b>   | <b>15.04 ± 3.38</b><br><b>P: 3.59 E-5</b>   | control > polyp ><br>hyper > EnCa |
| erv-3          | 30.47 ± 7.25    | <b>134.54 ± 38.45</b><br><b>P: 5.15 E-4</b> | <b>246.68 ± 97.39</b><br><b>P: 0.0021</b> | <b>82.95 ± 19.48</b><br><b>P: 4.10 E-5</b>  | control > EnCa ><br>polyp > hyper |
| envK1-6        | 3.32 ± 0.92     | <b>11.82 ± 3.74</b><br><b>P: 0.017</b>      | 15.41 ± 10.88<br>P: 0.276                 | <b>41.61 ± 17.27</b><br><b>P: 6.06 E-6</b>  | control > polyp ><br>hyper > EnCa |
| envT           | 28.27 ± 10.06   | 108.66 ± 51.40<br>P: 0.079                  | <b>72.09 ± 22.74</b><br><b>P: 0.0052</b>  | <b>195.14 ± 68.85</b><br><b>P: 1.34 E-4</b> | control > hyper ><br>polyp > EnCa |
| envRb          | 0.74 ± 0.31     | <b>18.42 ± 11.42</b><br><b>P: 0.0372</b>    | <b>6.35 ± 3.87</b><br><b>P: 0.033</b>     | <b>6.03 ± 2.00</b><br><b>P: 0.0062</b>      | control > EnCa ><br>hyper > polyp |
| envFc1         | 1.03 ± 0.40     | <b>8.43 ± 5.03</b><br><b>P: 0.048</b>       | 4.06 ± 1.93<br>P: 0.052                   | <b>12.13 ± 4.40</b><br><b>P: 4.02 E-4</b>   | control > hyper ><br>polyp > EnCa |
| envFc2         | 8.31 ± 2.13     | 45.52 ± 23.59<br>P: 0.140                   | <b>26.03 ± 8.3</b><br><b>P: 0.00131</b>   | <b>67.80 ± 17.27</b><br><b>P: 8.06 E-6</b>  | control > hyper ><br>polyp > EnCa |

|         |                |                                          |                                             |                                                |                                |
|---------|----------------|------------------------------------------|---------------------------------------------|------------------------------------------------|--------------------------------|
| envH1-3 | 126.01 ± 43.13 | 711.17 ± 400.09<br>P: 0.276              | <b>479.25 ± 192.61</b><br>P: <b>0.0015</b>  | <b>1,378.41 ± 596.86</b><br>P: <b>3.99 E-5</b> | control > hyper > polyp > EnCa |
| envV1   | 1.15 ± 0.59    | <b>10.64 ± 6.42</b><br>P: <b>0.0094</b>  | <b>3.73 ± 1.65</b><br>P: <b>0.0067</b>      | <b>10.64 ± 4.15</b><br>P: <b>0.0019</b>        | control > hyper > polyp = EnCa |
| envV2   | 0.44 ± 0.27    | <b>7.80 ± 4.90</b><br>P: <b>0.042</b>    | 1.40 ± 0.50<br>P: 0.056                     | <b>7.04 ± 2.80</b><br>P: <b>5.45 E-4</b>       | control > hyper > EnCa > polyp |
| envE    | 18.51 ± 6.59   | 16.86 ± 6.22<br>P: 0.396                 | <b>239.61 ± 139.65</b><br>P: <b>0.0134</b>  | <b>212.95 ± 122.15</b><br>P: <b>1.64 E-7</b>   | polyp > control > EnCa > hyper |
| envW2   | 23.05 ± 6.91   | <b>123.26 ± 48.85</b><br>P: <b>0.002</b> | <b>108.61 ± 37.79</b><br>P: <b>5.43 E-4</b> | <b>234.8 ± 72.19</b><br>P: <b>8.03 E-7</b>     | control > hyper > polyp > EnCa |

|            |         | pT1a<br>n= 15 | pT1b<br>n= 10 | pT2<br>n= 11 | G1<br>n= 15 | G2<br>n= 14 | G3<br>n= 9 |
|------------|---------|---------------|---------------|--------------|-------------|-------------|------------|
| Syncytin-1 | mol/ng  | 357.92        | 107.84        | 453.03       | 220.63      | 228.95      | 587.39     |
|            | +/- SEM | 108.46        | 60.22         | 227.96       | 69.38       | 114.56      | 261.17     |
|            | P:      |               | 0.035         |              |             | 0.027       |            |
| Syncytin-2 | mol/ng  | 8.69          | 4.65          | 17.52        | 12.50       | 5.59        | 12.31      |
|            | +/- SEM | 3.51          | 2.44          | 7.96         | 5.63        | 2.06        | 6.72       |
|            | P:      |               | 0.019         |              |             |             |            |
| Syncytin-3 | mol/ng  | 15.31         | 12.09         | 18.74        | 17.07       | 7.71        | 23.07      |
|            | +/- SEM | 4.70          | 5.69          | 8.57         | 4.90        | 4.03        | 9.63       |
| erv-3      | mol/ng  | 101.81        | 67.75         | 73.61        | 36.56       | 123.94      | 96.52      |
|            | +/- SEM | 47.18         | 20.04         | 11.95        | 5.02        | 49.38       | 19.49      |

**Supplemental Table 3: Gene expression of env genes by qPCR according to clinical categories.**

|         |         |          |        |          |                              |        |          |
|---------|---------|----------|--------|----------|------------------------------|--------|----------|
|         | P:      |          |        |          | 0.0178 (G1:G2) 0.025 (G1:G3) |        |          |
| envK1-6 | mol/ng  | 25.44    | 16.71  | 91.56    | 30.30                        | 16.99  | 98.77    |
|         | +/- SEM | 8.04     | 9.68   | 57.08    | 9.92                         | 7.86   | 69.52    |
| envT    | mol/ng  | 176.45   | 125.74 | 302.40   | 175.88                       | 58.86  | 439.25   |
|         | +/- SEM | 47.64    | 61.46  | 226.42   | 57.80                        | 18.62  | 266.13   |
|         | P:      |          |        |          | 0.023                        |        |          |
| envRb   | mol/ng  | 10.23    | 0.83   | 5.39     | 9.33                         | 2.10   | 6.68     |
|         | +/- SEM | 4.18     | 0.69   | 3.54     | 4.28                         | 1.33   | 3.96     |
|         | P:      | 0.0096   |        |          |                              |        |          |
| envFc1  | mol/ng  | 9.09     | 4.27   | 24.42    | 10.66                        | 10.82  | 16.63    |
|         | +/- SEM | 3.56     | 3.35   | 13.84    | 4.06                         | 8.80   | 11.48    |
| envFc2  | mol/ng  | 65.79    | 54.34  | 83.75    | 79.38                        | 31.22  | 105.42   |
|         | +/- SEM | 17.46    | 35.44  | 46.23    | 27.40                        | 10.86  | 53.60    |
|         | P:      |          |        |          | 0.027                        |        |          |
| envH1-3 | mol/ng  | 1,143.73 | 619.22 | 2,471.02 | 1,334.40                     | 244.43 | 3,215.73 |
|         | +/- SEM | 443.92   | 481.43 | 1,947.69 | 519.76                       | 85.06  | 2,340.54 |
|         | P:      |          |        |          | 0.032                        |        |          |
| envV1   | mol/ng  | 10.23    | 6.68   | 15.79    | 13.12                        | 1.84   | 20.20    |
|         | +/- SEM | 3.97     | 6.06   | 12.48    | 5.26                         | 1.07   | 15.04    |
|         | P:      |          |        |          | 0.049                        |        |          |
| envV2   | mol/ng  | 5.83     | 3.57   | 10.28    | 7.29                         | 1.11   | 15.88    |
|         | +/- SEM | 2.67     | 3.10   | 8.44     | 3.18                         | 0.64   | 10.35    |
| envE    | mol/ng  | 118.32   | 53.33  | 504.11   | 127.31                       | 50.42  | 608.50   |
|         | +/- SEM | 26.62    | 19.36  | 420.56   | 31.95                        | 12.49  | 511.64   |
|         | P:      |          |        |          | 0.038                        |        |          |
| envW2   | mol/ng  | 250.79   | 160.69 | 299.58   | 276.13                       | 82.13  | 403.42   |
|         | +/- SEM | 74.87    | 113.25 | 210.27   | 96.81                        | 26.45  | 253.44   |

Only statistical significances ( $P < 0.05$ ) are shown.
